# Supplementary material for: Molecular evidence of field cancerization initiated by diabetes in colon cancer patients
Source: PubMed Central journal article supplement (PMC6441931; doi:10.1002/1878-0261.12438), 2019-02-16
Supplement: MOL2-13-857-s001.pdf [file MOL2-13-857-s001.pdf]

## Supporting Information for

### Molecular evidences of field cancerization initiated by diabetes in colon cancer patients

Laura Del Puerto-Nevaldo 1\*, Pablo Minguez 2\*#, Marta Corton 2,3, Sonia Solanes-Casado 1, Isabel Prieto 4, Sebastian Mas 5, Ana Belen Sanz 6,7, Paula Gonzalez-Alonso 8, Cristina Villaverde 2,3, Sergio Portal-Nuñez 9,10, Oscar Aguilera 1, Carmen Gomez-Guerrero 5, Fernando Vivanco 11, Pedro Esbrit 9, Nieves Gonzalez 5, Carmen Ayuso 2,3, Alberto Ortiz 6,7, Federico Rojo 8, Jesús Egido 5, Gloria Alvarez-Llamas 7,11#, Jesus Garcia-Foncillas 1 on behalf of the DiabetesCancerConnect Consortium.

1 Translational Oncology Division, Oncohealth Institute, IIS-Fundacion Jimenez Diaz-UAM, Madrid, Spain. 2 Genetics Departement, IIS-Fundacion Jimenez Diaz-UAM, Madrid, Spain. 3 Center for Biomedical Network Research on Rare Diseases (CIBERER), ISCIII, Madrid, Spain. 4 Radiation Oncology, Oncohealth Institute, IIS-Fundacion Jimenez Diaz-UAM, Madrid, Spain. 5 Renal, Vascular and Diabetes Research Laboratory, IIS-Fundacion Jimenez Diaz-UAM, Spanish Biomedical Research Network in Diabetes and Associated Metabolic Disorders (CIBERDEM), Madrid, Spain. 6 Nephrology and Hypertension Department, IIS-Fundacion Jimenez Diaz-UAM, Madrid, Spain. 7 REDINREN, Madrid, Spain. 8 Pathology Department, IIS-Fundacion Jimenez Diaz-UAM, Madrid, Spain. 9 Bone and Mineral Metabolism Laboratory, IIS-Fundacion Jimenez Diaz-UAM, Madrid, Spain. 10 Applied Molecular Medicine Institute, School of Medicine, Universidad San Pablo CEU, CEU Universities, Madrid, Spain. 11 Immunology Department, IIS-Fundacion Jimenez Diaz-UAM, Madrid, Spain.

\*These authors contributed equally to this work; #Corresponding authors: pablo.minguez@quironsalud.es; galvarez@fjd.es

#### This PDF file includes:

Tables S1 to S8

Figures S1 to S4

**Table S1. Mutational, immunohistochemical and proliferation characterization of samples.**

| Gene sequencing                           | Non-diabetics |          | Diabetics |          | p-value<br>(Fisher's Exact test) |
|-------------------------------------------|---------------|----------|-----------|----------|----------------------------------|
|                                           | WT            | Mutant   | WT        | Mutant   |                                  |
| KRAS                                      | 14            | 9        | 14        | 9        | 1                                |
| NRAS                                      | 21            | 2        | 23        | 0        | 0.49                             |
| BRAF                                      | 21            | 2        | 20        | 3        | 1                                |
| Immunohistochemical analysis of MMR genes | Negative      | Positive | Negative  | Positive |                                  |
| MLH1                                      | 6             | 17       | 3         | 20       | 0.46                             |
| MSH2                                      | 1             | 22       | 0         | 23       | 1                                |
| MSH6                                      | 1             | 22       | 0         | 23       | 1                                |
| PSM2                                      | 6             | 17       | 3         | 20       | 0.46                             |
| Proliferation analysis                    | Low           | High     | Low       | High     |                                  |
| Ki-67                                     | 4             | 15       | 8         | 11       | 0.29                             |

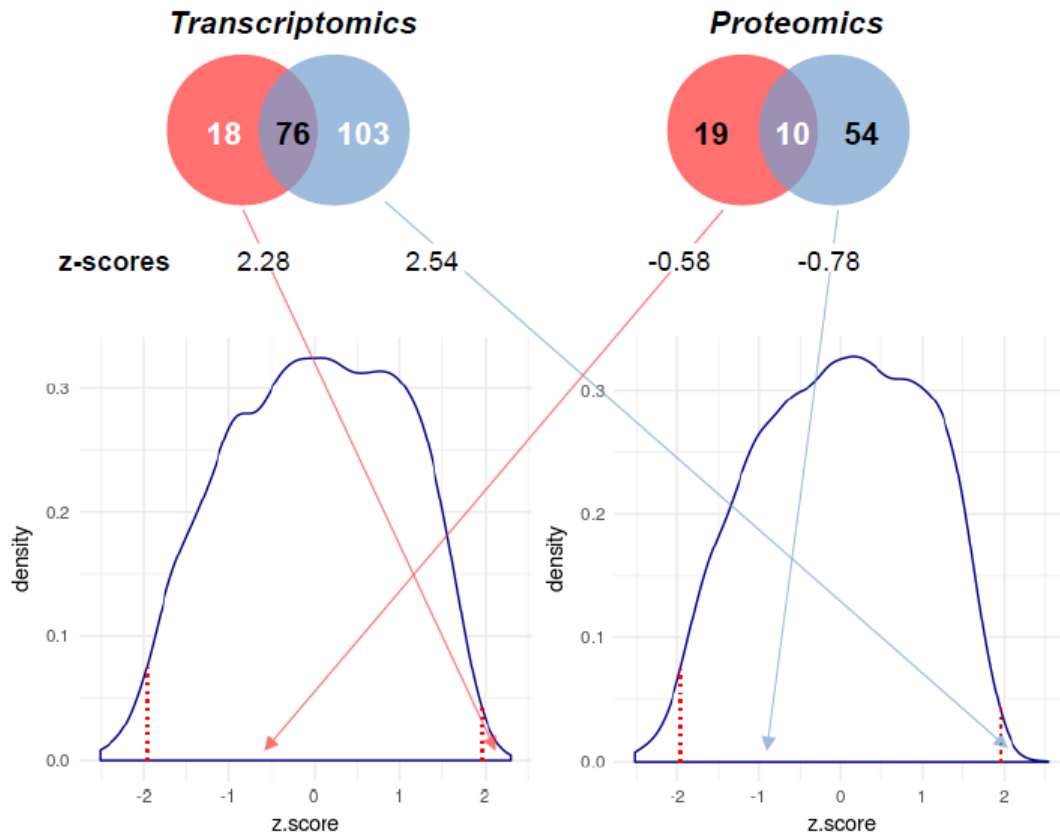

**Figure S1.** Overlap of KEGG pathways over-represented comparing: i) tumors from diabetic patients to tumors from non-diabetic patients; and ii) adjacent mucosa from diabetic patients to adjacent mucosa from non-diabetic patients.

**Table S2.** Common over-represented pathways in diabetic conditions in two comparisons: i) tumors from diabetic patients versus tumors from non-diabetic patients and ii) normal colonic mucosas from diabetic patients versus normal colonic mucosas from non-diabetic patients.

| KEGG id  | KEGG pathway name                     | Super-class              |
|----------|---------------------------------------|--------------------------|
| hsa01100 | Metabolic pathways                    | Global and overview maps |
| hsa00230 | Purine metabolism                     | Nucleotide metabolism    |
| hsa04012 | ErbB signaling pathway                | Signal transduction      |
| hsa04066 | HIF-1 signaling pathway               | Signal transduction      |
| hsa04068 | FoxO signaling pathway                | Signal transduction      |
| hsa04071 | Sphingolipid signaling pathway        | Signal transduction      |
| hsa04150 | mTOR signaling pathway                | Signal transduction      |
| hsa04151 | PI3K-Akt signaling pathway            | Signal transduction      |
| hsa04152 | AMPK signaling pathway                | Signal transduction      |
| hsa04210 | Apoptosis                             | Cell growth and death    |
| hsa04211 | Longevity regulating pathway - mammal | Aging                    |

|          |                                                      |                                  |
|----------|------------------------------------------------------|----------------------------------|
| hsa04510 | Focal adhesion                                       | Cellular community               |
| hsa04530 | Tight junction                                       | Cellular community               |
| hsa04660 | T cell receptor signaling pathway                    | Immune system                    |
| hsa04666 | Fc gamma R-mediated phagocytosis                     | Immune system                    |
| hsa04668 | TNF signaling pathway                                | Signal transduction              |
| hsa04722 | Neurotrophin signaling pathway                       | Nervous system                   |
| hsa04910 | Insulin signaling pathway                            | Endocrine system                 |
| hsa04919 | Thyroid hormone signaling pathway                    | Endocrine system                 |
| hsa04922 | Glucagon signaling pathway                           | Endocrine system                 |
| hsa04931 | Insulin resistance                                   | Endocrine and metabolic diseases |
| hsa04932 | Non-alcoholic fatty liver disease (NAFLD)            | Endocrine and metabolic diseases |
| hsa04933 | AGE-RAGE signaling pathway in diabetic complications | Endocrine and metabolic diseases |
| hsa05152 | Tuberculosis                                         | Infectious diseases: Bacterial   |
| hsa05161 | Hepatitis B                                          | Infectious diseases: Viral       |
| hsa05164 | Influenza A                                          | Infectious diseases: Viral       |
| hsa05166 | HTLV-I infection                                     | Infectious diseases: Viral       |
| hsa05169 | Epstein-Barr virus infection                         | Infectious diseases: Viral       |
| hsa05205 | Proteoglycans in cancer                              | Cancers: Overview                |
| hsa05213 | Endometrial cancer                                   | Cancers: Specific types          |
| hsa05222 | Small cell lung cancer                               | Cancers: Specific types          |
| hsa00520 | Amino sugar and nucleotide sugar metabolism          | Carbohydrate metabolism          |
| hsa03013 | RNA transport                                        | Translation                      |
| hsa05203 | Viral carcinogenesis                                 | Cancers: Overview                |
| hsa04144 | Endocytosis                                          | Transport and catabolism         |
| hsa05130 | Pathogenic Escherichia coli infection                | Infectious diseases: Bacterial   |
| hsa04141 | Protein processing in endoplasmic reticulum          | Folding, sorting and degradation |
| hsa05010 | Alzheimer's disease                                  | Neurodegenerative diseases       |
| hsa00240 | Pyrimidine metabolism                                | Nucleotide metabolism            |
| hsa03015 | mRNA surveillance pathway                            | Translation                      |
| hsa03010 | Ribosome                                             | Translation                      |
| hsa04142 | Lysosome                                             | Transport and catabolism         |
| hsa00190 | Oxidative phosphorylation                            | Energy metabolism                |
| hsa05012 | Parkinson's disease                                  | Neurodegenerative diseases       |
| hsa05016 | Huntington's disease                                 | Neurodegenerative diseases       |
| hsa03040 | Spliceosome                                          | Transcription                    |
| hsa04120 | Ubiquitin mediated proteolysis                       | Folding, sorting and degradation |
| hsa00970 | Aminoacyl-tRNA biosynthesis                          | Translation                      |
| hsa05100 | Bacterial invasion of epithelial cells               | Infectious diseases: Bacterial   |
| hsa05131 | Shigellosis                                          | Infectious diseases: Bacterial   |
| hsa04520 | Adherens junction                                    | Cellular community               |
| hsa04110 | Cell cycle                                           | Cell growth and death            |
| hsa04114 | Oocyte meiosis                                       | Cell growth and death            |
| hsa04115 | p53 signaling pathway                                | Cell growth and death            |

|          |                                                            |                                    |
|----------|------------------------------------------------------------|------------------------------------|
| hsa05168 | Herpes simplex infection                                   | Infectious diseases: Viral         |
| hsa03008 | Ribosome biogenesis in eukaryotes                          | Translation                        |
| hsa00510 | N-Glycan biosynthesis                                      | Glycan biosynthesis and metabolism |
| hsa05120 | Epithelial cell signaling in Helicobacter pylori infection | Infectious diseases: Bacterial     |
| hsa03022 | Basal transcription factors                                | Transcription                      |
| hsa00270 | Cysteine and methionine metabolism                         | Amino acid metabolism              |
| hsa01230 | Biosynthesis of amino acids                                | Global and overview maps           |
| hsa04145 | Phagosome                                                  | Transport and catabolism           |
| hsa05110 | Vibrio cholerae infection                                  | Infectious diseases: Bacterial     |
| hsa00040 | Pentose and glucuronate interconversions                   | Carbohydrate metabolism            |
| hsa04621 | NOD-like receptor signaling pathway                        | Immune system                      |
| hsa04070 | Phosphatidylinositol signaling system                      | Signal transduction                |
| hsa00562 | Inositol phosphate metabolism                              | Carbohydrate metabolism            |
| hsa04962 | Vasopressin-regulated water reabsorption                   | Excretory system                   |
| hsa00500 | Starch and sucrose metabolism                              | Carbohydrate metabolism            |
| hsa01200 | Carbon metabolism                                          | Global and overview maps           |
| hsa03060 | Protein export                                             | Folding, sorting and degradation   |
| hsa00630 | Glyoxylate and dicarboxylate metabolism                    | Carbohydrate metabolism            |
| hsa00480 | Glutathione metabolism                                     | Metabolism of other amino acids    |
| hsa00020 | Citrate cycle (TCA cycle)                                  | Carbohydrate metabolism            |
| hsa01210 | 2-Oxocarboxylic acid metabolism                            | Global and overview maps           |
| hsa00030 | Pentose phosphate pathway                                  | Carbohydrate metabolism            |

**Table S3.** Common over-represented pathways in diabetic conditions in tumors and normal mucosas from human and xenograft samples. The table is composed by the pathways that have fulfilled three conditions: 1) over-represented in tumors from diabetic patients versus tumors from non-diabetic patients; 2) over-represented normal colonic mucosas from diabetic patients versus normal colonic mucosas from non-diabetic patients; 3) over-represented in tumors from diabetic xenografts versus tumors from non-diabetic xenografts.

| KEGG id  | KEGG pathway name                           | Super-class                      |
|----------|---------------------------------------------|----------------------------------|
| hsa01100 | Metabolic pathways                          | Global and overview maps         |
| hsa00230 | Purine metabolism                           | Nucleotide metabolism            |
| hsa04012 | ErbB signaling pathway                      | Signal transduction              |
| hsa04152 | AMPK signaling pathway                      | Signal transduction              |
| hsa04211 | Longevity regulating pathway - mammal       | Aging                            |
| hsa04722 | Neurotrophin signaling pathway              | Nervous system                   |
| hsa04910 | Insulin signaling pathway                   | Endocrine system                 |
| hsa04922 | Glucagon signaling pathway                  | Endocrine system                 |
| hsa04931 | Insulin resistance                          | Endocrine and metabolic diseases |
| hsa04932 | Non-alcoholic fatty liver disease (NAFLD)   | Endocrine and metabolic diseases |
| hsa05169 | Epstein-Barr virus infection                | Infectious diseases: Viral       |
| hsa00520 | Amino sugar and nucleotide sugar metabolism | Carbohydrate metabolism          |

|          |                                                            |                                    |
|----------|------------------------------------------------------------|------------------------------------|
| hsa03013 | RNA transport                                              | Translation                        |
| hsa05203 | Viral carcinogenesis                                       | Cancers: Overview                  |
| hsa04144 | Endocytosis                                                | Transport and catabolism           |
| hsa04141 | Protein processing in endoplasmic reticulum                | Folding, sorting and degradation   |
| hsa05010 | Alzheimer's disease                                        | Neurodegenerative diseases         |
| hsa00240 | Pyrimidine metabolism                                      | Nucleotide metabolism              |
| hsa03015 | mRNA surveillance pathway                                  | Translation                        |
| hsa03010 | Ribosome                                                   | Translation                        |
| hsa04142 | Lysosome                                                   | Transport and catabolism           |
| hsa00190 | Oxidative phosphorylation                                  | Energy metabolism                  |
| hsa05012 | Parkinson's disease                                        | Neurodegenerative diseases         |
| hsa05016 | Huntington's disease                                       | Neurodegenerative diseases         |
| hsa03040 | Spliceosome                                                | Transcription                      |
| hsa04120 | Ubiquitin mediated proteolysis                             | Folding, sorting and degradation   |
| hsa00970 | Aminoacyl-tRNA biosynthesis                                | Translation                        |
| hsa05131 | Shigellosis                                                | Infectious diseases: Bacterial     |
| hsa04110 | Cell cycle                                                 | Cell growth and death              |
| hsa04114 | Oocyte meiosis                                             | Cell growth and death              |
| hsa04115 | p53 signaling pathway                                      | Cell growth and death              |
| hsa05168 | Herpes simplex infection                                   | Infectious diseases: Viral         |
| hsa03008 | Ribosome biogenesis in eukaryotes                          | Translation                        |
| hsa00510 | N-Glycan biosynthesis                                      | Glycan biosynthesis and metabolism |
| hsa05120 | Epithelial cell signaling in Helicobacter pylori infection | Infectious diseases: Bacterial     |
| hsa03022 | Basal transcription factors                                | Transcription                      |
| hsa00270 | Cysteine and methionine metabolism                         | Amino acid metabolism              |
| hsa01230 | Biosynthesis of amino acids                                | Global and overview maps           |
| hsa00040 | Pentose and glucuronate interconversions                   | Carbohydrate metabolism            |
| hsa04070 | Phosphatidylinositol signaling system                      | Signal transduction                |
| hsa00562 | Inositol phosphate metabolism                              | Carbohydrate metabolism            |
| hsa04962 | Vasopressin-regulated water reabsorption                   | Excretory system                   |
| hsa00500 | Starch and sucrose metabolism                              | Carbohydrate metabolism            |
| hsa01200 | Carbon metabolism                                          | Global and overview maps           |
| hsa03060 | Protein export                                             | Folding, sorting and degradation   |
| hsa00630 | Glyoxylate and dicarboxylate metabolism                    | Carbohydrate metabolism            |
| hsa00480 | Glutathione metabolism                                     | Metabolism of other amino acids    |
| hsa00020 | Citrate cycle (TCA cycle)                                  | Carbohydrate metabolism            |
| hsa01210 | 2-Oxocarboxylic acid metabolism                            | Global and overview maps           |
| hsa00030 | Pentose phosphate pathway                                  | Carbohydrate metabolism            |

**Table S4.** Over-represented pathways involved in inflammation (24) in diabetic conditions in two comparisons: i) tumors from diabetic patients versus tumors from non-diabetic patients and ii) normal colonic mucosas from diabetic patients versus normal colonic mucosas from non-diabetic patients. Pathways in common between the comparisons are colored in light gray.

| <b>Over-represented inflammation pathways in tumors from diabetic patients versus tumors from non-diabetic patients</b>                               |                                                                                                                                                                                                                                                                                                                                                                                                                                                                                                                                                                                                                                                                                                                                       |                             |
|-------------------------------------------------------------------------------------------------------------------------------------------------------|---------------------------------------------------------------------------------------------------------------------------------------------------------------------------------------------------------------------------------------------------------------------------------------------------------------------------------------------------------------------------------------------------------------------------------------------------------------------------------------------------------------------------------------------------------------------------------------------------------------------------------------------------------------------------------------------------------------------------------------|-----------------------------|
| <b>Pathway name (involved in inflammation)</b>                                                                                                        | <b>Annotated genes</b>                                                                                                                                                                                                                                                                                                                                                                                                                                                                                                                                                                                                                                                                                                                | <b>FDR adjusted p-value</b> |
| Adhesion-Extravasation-Migration                                                                                                                      | PTPRU,VCAM1,CD58,CD2,MUC1,CD48,F11R,XCL1,SELP,SELL,SELE,RASSF5,CD34,ITGB1,CXCL12,VCAM1,ADAM8,ARHGAP1,SIPA1,CTTN,FUT4,MMP7,MMP10,MMP1,MMP12,THY1,JAM3,CD9,ITGB7,ITGA5,MMP19,MYL6,SELPLG,PXN,MMP14,SPN,ITGAL,ITGAM,ITGAX,ITGAD,MMP2,CCL22,CX3CL1,CCL17,CDH5,CRK,ITGAE,CXCL16,MYH10,CCL2,CCL11,CCL8,CCL13,CCL1,CCL5,CCL16,CCL23,CCL4,CCR7,ITGA2B,ITGB3,ITGA3,ICAM2,PECAM1,ITGB4,CD226,ICAM1,ICAM5,ICAM3,CEACAM5,CEACAM6,CEACAM1,CEACAM8,PLAUR,VASP,CD33,ROCK2,ITGA6,ITGA4,ITGAV,ALS2,CCL20,SIGLEC1,MMP9,JAM2,ITGB2,MYH9,CCR4,CX3CR1,CCR8,CXCR6,XCR1,CCR1,CCR3,CCR2,CCR5,CCR2L2,RHOA,ALCAM,CD47,CD96,RHOH,PPBP,CXCL5,CXCL3,CXCL2,CXCL9,CXCL10,CXCL11,CXCL13,FYB,CCL28,ITGA2,CXCL14,LECT2,HMMR,NT5E,CCR6,CCL26,CCL24,CD36,CCL19,CCL21,CD99 | 0.04                        |
| Apoptosis Signaling                                                                                                                                   | DFFB,DFFA,CASP9,MCL1,DAP3,LMNA,FASLG,CAPN2,PARP1,FAS,CASP7,GAS2,BAD,CAPN1,FADD,BIRC3,BIRC2,CASP12,BCL2L14,CRADD,APAF1,DIABLO,ACIN1,RIPK3,BCL2L10,BCL2A1,TP53,ROCK1,BCL2,CASP14,CAPNS1,BAX,BCL2L12,HTRA2,BCL2L11,TANK,CFLAR,CASP10,CASP8,CAPN10,BCL2L1,BCL2L13,A4GALT,BIK,FAIM,PTPN13,CASP6,CASP3,DAP,DAXX,BAK1,TNFRSF21,CASP8AP2,CYCS,CASP2,TNFRSF10B,TNFRSF10D,TNFRSF10A,DAPK1,SPTAN1,ENDOG                                                                                                                                                                                                                                                                                                                                          | 0.003                       |
| Glucocorticoid/PPAR signaling                                                                                                                         | GMEB1,FAF1,FKBP4,NR4A1,NCOA1,NR4A2,SDPR,HSPD1,GMEB2,NRIP1,PPARA,KPNA1,NR3C1,CITED2,GLCC1,NCOA2                                                                                                                                                                                                                                                                                                                                                                                                                                                                                                                                                                                                                                        | 0.039                       |
| MAPK signaling                                                                                                                                        | PRKCZ,RAP1GAP,RPS6KA1,MAP3K6,HDAC1,MKNK1,JUN,RAP1A,NRAS,SHC1,MEF2D,IFI16,PLA2G4A,MAPKAPK2,ATF3,DUSP10,PRKCQ,MAPK8,HRAS,MADD,RPS6KA4,FOSL1,PPP1CA,PAK1,PPP2R1B,ETS1,KRAS,RAPGEF3,ATF1,DDIT3,DUSP6,PPP1CC,MAPKAPK5,SOS2,PPM1A,MAX,FOS,RPS6KA5,RASGRP1,TLN2,MAP2K1,MEF2A,MAPK3,BCAR1,MAP2K4,KSR1,PRKCA,MAP2K6,MAP2K2,JUND,MAP4K1,PPP2R1A,YWHAQ,MYCN,PPP1CB,SOS1,PRKCE,DUSP2,ATF2,PPP1R7,SRC,PLCG1,YWHAB,ETS2,HMGN1,MAPK1,YWHAH,ATF4,EP300,MAPK12,MAPK11,PPARG,RAF1,KCNH8,MAPKAPK3,PRKCD,PPP2R3A,EGF,MAP3K1,RASA1,MEF2C,HINT1,PPP2CA,PPP2R2B,DUSP1,MAPK9,MAPK14,MAPK13,MAP3K7,HDAC2,PTPRK,MAP3K5,ESR1,RAC1,EGFR,HSPB1,YWHAG,DUSP4,PPP2CB,LYN,YWHAZ,MYC,PTK2,TLN1,RAPGEF1,ARAF,ELK1,DUSP9                                                  | 2.820E-5                    |
| PI3K/AKT Signaling                                                                                                                                    | PIK3CD,PIK3R3,THEM4,AKT3,MAP3K8,ILK,RPS6KB2,CCND1,INPPL1,CDKN1B,MDM2,HSP90AA1,AKT1,TSC2,PDPK1,PIK3R5,MYH4,RPS6KB1,CDC37,PIK3R2,AKT2,INPP5D,CTNNB1,PIK3CB,PIK3CA,EIF4E,GAB1,PIK3R1,CDKN1A,NOS3,RHEB,TSC1                                                                                                                                                                                                                                                                                                                                                                                                                                                                                                                               | 0.004                       |
| <b>Over-represented inflammation pathways in normal colonic mucosa from diabetic patients versus normal colonic mucosa from non-diabetic patients</b> |                                                                                                                                                                                                                                                                                                                                                                                                                                                                                                                                                                                                                                                                                                                                       |                             |
| <b>Pathway name (involved in inflammation)</b>                                                                                                        | <b>Annotated genes</b>                                                                                                                                                                                                                                                                                                                                                                                                                                                                                                                                                                                                                                                                                                                | <b>FDR adjusted p-value</b> |
| Apoptosis Signaling                                                                                                                                   | DFFB,DFFA,CASP9,MCL1,DAP3,LMNA,FASLG,CAPN2,PARP1,FAS,CASP7,GAS2,BAD,CAPN1,FADD,BIRC3,BIRC2,CASP12,BCL2L14,CRADD,APAF1,DIABLO,ACIN1,RIPK3,BCL2L10,BCL2A1,TP53,ROCK1,BCL2,CASP14,CAPNS1,BAX,BCL2L12,HTRA2,BCL2L11,TANK,CFLAR,CASP10,CASP8,CAPN10,BCL2L1,BCL2L13,A4GALT,BIK,FAIM,PTPN13,CASP6,CASP3,DAP,DAXX,BAK1,TNFRSF21,CASP8AP2,CYCS,CASP2,TNFRSF10B,TNFRSF10D,TNFRSF10A,DAPK1,SPTAN1,ENDOG                                                                                                                                                                                                                                                                                                                                          | 0.002                       |
| Glucocorticoid/PPAR signaling                                                                                                                         | GMEB1,FAF1,FKBP4,NR4A1,NCOA1,NR4A2,SDPR,HSPD1,GMEB2,NRIP1,PPARA,KPNA1,NR3C1,CITED2,GLCC1,NCOA2                                                                                                                                                                                                                                                                                                                                                                                                                                                                                                                                                                                                                                        | 0.001                       |
| MAPK signaling                                                                                                                                        | PRKCZ,RAP1GAP,RPS6KA1,MAP3K6,HDAC1,MKNK1,JUN,RAP1A,NRAS,SHC1,MEF2D,IFI16,PLA2G4A,MAPKAPK2,ATF3,DUSP10,PRKCQ,MAPK8,HRAS,MADD,RPS6KA4,FOSL1,PPP1CA,PAK1,PPP2R1B,ETS1,KRAS,RAPGEF3,ATF1,DDIT3,DUSP6,PPP1CC,MAPKAPK5,SOS2,PPM1A,MAX,FOS,RPS6KA5,RASGRP1,TLN2,MAP2K1,MEF2A,MAPK3,BCAR1,MAP2K4,KSR1,PRKCA,MAP2K6,MAP2K2,JUND,MAP4K1,PPP2R1A,YWHAQ,MYCN,PPP1CB,SOS1,PRKCE,DUSP2,ATF2,PPP1R7,SRC,PLCG1,YWHAB,ETS2,HMGN1,MAPK1,YWHAH,ATF4,EP300,MAPK12,MAPK11,PPARG,RAF1,KCNH8,MAPKAPK3,PRKCD,PPP2R3A,EGF,MAP3K1,RASA1,MEF2C,HINT1,PPP2CA,PPP2R2B,DUSP1,MAPK9,MAPK14,MAPK13,MAP3K7,HDAC2,PTPRK,MAP3K5,ESR1,RAC1,EGFR,HSPB1,YWHAG,DUSP4,PPP2CB,LYN,YWHAZ,MYC,PTK2,TLN1,RAPGEF1,ARAF,ELK1,DUSP9                                                  | 2.946E-7                    |
| PI3K/AKT Signaling                                                                                                                                    | PIK3CD,PIK3R3,THEM4,AKT3,MAP3K8,ILK,RPS6KB2,CCND1,INPPL1,CDKN1B,MDM2,HSP90AA1,AKT1,TSC2,PDPK1,PIK3R5,MYH4,RPS6KB1,CDC37,PIK3R2,AKT2,INPP5D,CTNNB1,PIK3CB,PIK3CA,EIF4E,GAB1,PIK3R1,CDKN1A,NOS3,RHEB,TSC1                                                                                                                                                                                                                                                                                                                                                                                                                                                                                                                               | 4.639E-4                    |

**Table S5.** Proteins up- and down-regulated in two tumors and normal colonic mucosa from patients with diabetes. TD means tumors from diabetic patients. T, tumors from non-diabetic patients. ND, normal colonic mucosa from diabetic patients. And N, normal colonic mucosa from non-diabetic patients.

| Comparison                         | Filter (significance) | Up-regulated in condition | Proteins                                                                                                                                                                                                                                                                                                                                                                                                                                                                                                                                                                                                                                                                                                                                                                                                                                                                                                                                                                                                                                                                                                                                                                                                                                                                                                                                                                                                                                                                                                                                                                                                                                                                                                                                                                                                                                                                                                                                                                                                                                                                                                                                                                                                                                                                   |
|------------------------------------|-----------------------|---------------------------|----------------------------------------------------------------------------------------------------------------------------------------------------------------------------------------------------------------------------------------------------------------------------------------------------------------------------------------------------------------------------------------------------------------------------------------------------------------------------------------------------------------------------------------------------------------------------------------------------------------------------------------------------------------------------------------------------------------------------------------------------------------------------------------------------------------------------------------------------------------------------------------------------------------------------------------------------------------------------------------------------------------------------------------------------------------------------------------------------------------------------------------------------------------------------------------------------------------------------------------------------------------------------------------------------------------------------------------------------------------------------------------------------------------------------------------------------------------------------------------------------------------------------------------------------------------------------------------------------------------------------------------------------------------------------------------------------------------------------------------------------------------------------------------------------------------------------------------------------------------------------------------------------------------------------------------------------------------------------------------------------------------------------------------------------------------------------------------------------------------------------------------------------------------------------------------------------------------------------------------------------------------------------|
| TDvsT                              | p-value<0.05          | TD                        | O14602,P04155,P13727,P22090,Q96EY8,Q9H773,Q96C36,O75394,Q9BTM1,P00492,A6NDG6,P55210,Q9H5Q4,Q9NPJ3,Q9Y2S6,O95154,P11908,P00505,P30044,Q9Y5J9,Q9Y3E5,Q9BWD1,Q9Y5L4,O14907,Q9BQC6,Q96E H3,Q01581,Q9H3K6,Q96HS1,Q9BRT2,Q0JRZ9,Q9NRX2,Q969Z0,Q9H0U6,P62328,P99999,Q9Y2Q9,P05141,P2 0933,P18077,Q9NRN9,A8MWD9,Q96EL3,Q6P161,Q9BYC9,Q9Y2R5,Q13404,Q9UJA5,P49406,P60983,Q86SX6, P61604,P22676,O00182,P62910,Q9H9J2,O14497,P11177,E1BJK2,P15735,Q9C099,P62750,P00491,Q9Y5J7,P5 3634,Q14376,Q96BR5,Q9H8Y8,Q15185,Q92688,O00584,P62888,P46779,P14406,Q9P0P8,Q8IXM2,Q9Y221,P30 405,Q7Z4W1,P49458,Q8NCW5,Q99757,Q9C005,Q8TBX8,P61289,Q01469,Q9NU11,P62266,P62851,Q9NY12,Q8 NFNH4,Q9Y5S9,Q9NSA3,P39019,Q8NHP8,Q9BY32,Q8IV56,P02042,O60220,P61088,P56381,Q9NX20,Q9BTZ2,P 46776,Q9Y3U8,P47914,P35900,Q9UI30,P37802,O75340,P26373,P49419,P35268,P49207,P50053,Q00688,Q9Y3 A6,Q9GZT3,Q9ULC4,P61960,Q16540,P62899,Q8WUH6,Q9Y3B7,Q9BYN8,O60568,Q9Y6H1,Q13907,P62854,P6 2318,P82664,P49720,P15880,Q96BP2,Q9UKK9,Q9UII2,P63173,P07919,Q9POM9,Q9Y2S7,Q9NX08,Q8N983,O0 0154,Q13405,P61313,Q9NZJ9,Q13162,P62277,Q00325,Q9BSH4,Q92598,P16278,O75506,Q9BQ67,P34897,P17 931,P62280,Q99519,Q15691,Q13084,Q7Z4G1,Q9Y3D3,Q9BQ61,Q9NY33,P62917,P46781,P32322,P55854,P193 87,Q9Y3B4,Q96G21,Q6ZRR9,P42766,Q7L0Y3,P40429,Q92947,P62857,Q96D15,Q5T653,Q6PCE3,O15212,P257 88,Q15370,Q96DV4,Q8WXA9,Q92506,P82933,P35222,Q9BRJ2,Q13595,Q9Y399,P36135,Q9H892,P53999,P365 51,O75431,Q7Z478,P62877,O43402,Q9NS39,P09211,Q9Y6A4,P04424,P12532,P32969,P62829,P07954,P39023, Q9BZE1,P37837,O14734,P27635,Q02543,P48163,Q9H0A8,P15289,Q9NUL7,Q07021,Q9Y606,Q8TCS8,P52655, P55263,O43169,P18124,P62913,P38117,Q16740,P26639,O14737,Q9BYC8,P62306,O76003,P61970,P62847,Q9 H299,Q9H910,P10515,P61326,P10619,P61758,Q9NP97,P48729,Q9NYK5,P37108,P18283,O43324,P05166,P6202 90,P57105,P49721,Q9NTK5,P20962,Q9NPA8,P04066,O14561,P13798,P78406,P63244,P05386,Q9P015,P62424 ,Q86WA6,Q15363,P10809,P62906,Q9Y6G5,P27797,Q5EBL8,Q9UMS0,Q9NS69,P62241,Q9NQ50,Q07020,Q9BR 76,P01876,Q9NUB1,P61966,Q9UKD2,Q13242,P55145,Q02878,Q9H0N5,P29401,P05455,Q13765,P63220,Q1584 3,Q9H1E3,Q8IZQ5,P46777,Q9UK76,P62081,P05387,Q9HAB8,P51649,P53597,Q9Y446,P61457,Q95336,P35914, P82979,Q5JRX3,Q00059,P63241,Q9P2E9,P83731,P62495,Q9Y3C6,O60869 |
| TDvsT                              | p-value<0.05          | T (down-regulated in TD)  | P07996,Q28194_CONT,P02662_CONT,P62834,O14791,P23297,P09493,P16188,Q9H9S4,P01033,P02749,O432 94,P52848,P02647,P08493,Q13642,P17661,P22352,Q95810,Q3SX28_CONT,Q9Y3S2,Q12888,P01625,P02774, Q9Y3D6,P05362,O15061,Q9NZT1,P51911,O60271,P47895,Q9Y639,Q16853,P14649,P00325,Q99715,P20774,P 19823,P00450,Q9BW30,Q8N5H7,P01860,P02768,P52943,P12109,P02765,P53814,P08243,P10909,Q9BZL4,P02 766,Q9UMS6,Q9NR12,Q15124,P02748,Q8TAE6,Q53GL0,P29536,P05546,Q9UKA9,P12110,Q5JTV8,Q9UJW0,Q 9H4G4,Q14314,P35749,Q9BQE5,Q7Z4I7,P08567,Q63ZY3,Q9Y2W1,P07360,Q5T8P6,P01009,Q04828,Q96JJ7,Q 16658,P04258_CONT,Q9UGI8,Q6PCB0,Q96BX8,P21333,Q9BX66,P29590,Q93052,P02747,P02649,P21589,Q9N PQ8,P05090,P00488,P07099,Q94811,P09104,P23497,O00159,P02787,Q9Y3B3,P08123,Q14315,O14974,P0100 8,Q9UI12,O75475,P18206,Q56VL3,O00423,P51608,Q9UBQ7,Q12765,P48739,Q95721,Q15628,Q06033,Q9NVV 4,P18583                                                                                                                                                                                                                                                                                                                                                                                                                                                                                                                                                                                                                                                                                                                                                                                                                                                                                                                                                                                                                                                                                                                                                                                                                                                                                                                                                                                                   |
| TDvsT                              | p-value<0.05 + FC>1.2 | TD                        | O14602,P04155,P13727,P22090,Q96EY8,Q9H773,Q96C36,O75394,Q9BTM1,P00492,A6NDG6,P55210,Q9H5Q4 ,Q9NPJ3,Q9Y2S6,O95154,P11908,P00505,P30044,Q9Y5J9,Q9Y3E5,Q9BWD1,Q9Y5L4,O14907,Q9BQC6,Q96E H3,Q01581,Q9H3K6,Q96HS1,Q9BRT2,Q0JRZ9,Q9NRX2,Q969Z0,Q9H0U6,P62328,P99999,Q9Y2Q9,P05141,P2 0933,P18077,Q9NRN9,A8MWD9,Q96EL3,Q6P161,Q9BYC9,Q9Y2R5,Q13404,Q9UJA5,P49406,P60983,Q86SX6, P61604,P22676,O00182,P62910,Q9H9J2,O14497,P11177,E1BJK2,P15735,Q9C099,P62750,P00491,Q9Y5J7,P5 3634,Q14376,Q96BR5,Q9H8Y8,Q15185,Q92688,O00584,P62888,P46779,P14406,Q9P0P8,Q8IXM2,Q9Y221,P30 405,Q7Z4W1,P49458,Q8NCW5,Q99757,Q9C005,Q8TBX8,P61289,Q01469,Q9NU11,P62266,P62851,Q9NY12,Q8 NFNH4,Q9Y5S9,Q9NSA3,P39019,Q8NHP8,Q9BY32,Q8IV56,P02042,O60220,P61088,P56381,Q9NX20,Q9BTZ2,P 46776,Q9Y3U8,P47914,P35900,Q9UI30,P37802,O75340,P26373,P49419,P35268,P49207,P50053,Q00688,Q9Y3 A6,Q9GZT3,Q9ULC4,P61960,Q16540,P62899,Q8WUH6,Q9Y3B7,Q9BYN8,O60568,Q9Y6H1,Q13907,P62854,P6 2318,P82664,P49720,P15880,Q96BP2,Q9UKK9,Q9UII2,P63173,P07919,Q9POM9,Q9Y2S7,Q9NX08,Q8N 983,O00154,Q13405,P61313,Q9NZJ9,Q13162,P62277,Q00325,Q9BSH4,Q92598,P16278,O75506,Q9BQ67,P348 97,P17931,P62280,Q99519,Q15691,Q13084,Q7Z4G1,Q9Y3D3,Q9BQ61,Q9NY33,P62917,P46781,P32322,P5585 4,P19387,Q9Y3B4,Q96G21,Q6ZRR9,P42766,Q7L0Y3,P40429                                                                                                                                                                                                                                                                                                                                                                                                                                                                                                                                                                                                                                                                                                                                                                                                                                                                                                                                                                                     |
| TDvsT                              | p-value<0.05+ FC>1.2  | T (down-regulated in TD)  | P07996,Q28194_CONT,P02662_CONT,P62834,O14791,P23297,P09493,P16188,Q9H9S4,P01033,P02749,O432 94,P52848,P02647,P08493,Q13642,P17661,P22352,Q95810,Q3SX28_CONT,Q9Y3S2,Q12888,P01625,P02774, Q9Y3D6,P05362,O15061,Q9NZT1,P51911,O60271,P47895,Q9Y639,Q16853,P14649,P00325,Q99715,P20774,P 19823,P00450,Q9BW30,Q8N5H7,P01860,P02768,P52943,P12109,P02765,P53814,P08243,P10909,Q9BZL4,P02 766,Q9UMS6,Q9NR12,Q15124,P02748,Q8TAE6,Q53GL0,P29536,P05546,Q9UKA9,P12110,Q5JTV8,Q9UJW0,Q 9H4G4,Q14314,P35749,Q9BQE5,Q7Z4I7,P08567,Q63ZY3,Q9Y2W1,P07360,Q5T8P6,P01009,Q04828,Q96JJ7,Q 16658,P04258_CONT,Q9UGI8,Q6PCB0,Q96BX8,P21333,Q9BX66,P29590,Q93052,P02747,P02649,P21589,Q9N PQ8,P05090,P00488,P07099,Q94811,P09104,P23497,O00159,P02787,Q9Y3B3,P08123,Q14315,O14974,P0100 8,Q9UI12,O75475,P18206,Q56VL3,O00423,P51608,Q9UBQ7,Q12765,P48739,Q95721,Q15628,Q06033,Q9NVV 4,P18583                                                                                                                                                                                                                                                                                                                                                                                                                                                                                                                                                                                                                                                                                                                                                                                                                                                                                                                                                                                                                                                                                                                                                                                                                                                                                                                                                                                                   |
| NDvsN                              | p-value<0.05          | ND                        | O14602,Q9Y5J9,P01763,P36269,Q9Y6U3,Q9H190,Q9Y2B9,P13761,P62987,O14964,O60218,P12724,A1L188,O 14734,Q96EY8,P21741,Q9UBY9,P14854,P16444,Q92506,P42566,Q9UBC5,Q16610,O00748,P30039,Q94925,P1 0109,Q9H6S3,Q16270,P02676,Q9H0U6,Q9Y606,P51970,Q96GE6,Q5JTV8,Q9UM07,Q96BS2,Q96YJ6,Q6UWP2, O75880,Q4U2R6,P02070,P12830,Q96EY5,Q9H3R2,P00403,Q12805,O60220,Q86S2Z,P03950,Q96EL3,P01860, P39060,Q86WA6,Q9Y2S2,P02753,Q9H5X1,Q02978,Q969M7,P46734,P16152,P03928,Q95716,Q9UI30,Q96IX5,P 08134,Q12864,P62910,Q9BPX5,Q01970,Q08257,P02511,P13611,P18077,O14558,Q9NNUW5,Q95340,P62873,Q9 P2B2,Q9H5N1,Q14197,Q4G0F5                                                                                                                                                                                                                                                                                                                                                                                                                                                                                                                                                                                                                                                                                                                                                                                                                                                                                                                                                                                                                                                                                                                                                                                                                                                                                                                                                                                                                                                                                                                                                                                                                                                                       |
| NDvsN                              | p-value<0.05          | N (down-regulated in ND)  | P52848,Q95678,Q92764,Q9BZL1,O15234,P23297,P15241,P23219,P02652,Q96RU3,Q9NXA8,Q96T23,P02654,Q 9Y3D6,Q8TDX6,Q9Y6K5,P02647,Q16795,Q8N5H7,Q9Y244,P33241,P14317,Q63ZY3,Q14908,Q14344,P10412,Q 6UXN9,Q96JJ3,P00326,P84157,O15247,Q96MU7,P49959,O43813,P20160,P07305,P20774,Q6XJG1,Q9Y3E1,P 35269,Q86UX7,P18206,P51608,Q96A08,P05043,Q5SSJ5,Q13303,Q16543,Q13425,P10301,P42226,Q14894,P33 992,P52566,P11766,P20962,Q14005,P49915,P33991,Q02790                                                                                                                                                                                                                                                                                                                                                                                                                                                                                                                                                                                                                                                                                                                                                                                                                                                                                                                                                                                                                                                                                                                                                                                                                                                                                                                                                                                                                                                                                                                                                                                                                                                                                                                                                                                                                                    |
| NDvsN                              | p-value<0.05 + FC>1.2 | ND                        | O14602,Q9Y5J9,P01763,P36269,Q9Y6U3,Q9H190,Q9Y2B9,P13761,P62987,O14964,O60218,P12724,A1L188,O 14734,Q96EY8,P21741,Q9UBY9,P14854,P16444,Q92506,P42566,Q9UBC5,Q16610,O00748,P30039,Q94925,P1 0109,Q9H6S3,Q16270,P02676,Q9H0U6,Q9Y606,P51970,Q96GE6,Q5JTV8,Q9UM07,Q96BS2,Q96YJ6,Q6UWP2, O75880,Q4U2R6,P02070,P12830,Q96EY5,Q9H3R2,P00403,Q12805,O60220,Q86S2Z,P03950,Q96EL3                                                                                                                                                                                                                                                                                                                                                                                                                                                                                                                                                                                                                                                                                                                                                                                                                                                                                                                                                                                                                                                                                                                                                                                                                                                                                                                                                                                                                                                                                                                                                                                                                                                                                                                                                                                                                                                                                                    |
| NDvsN                              | p-value<0.05+ FC>1.2  | N (down-regulated in ND)  | P52848,Q95678,Q92764,Q9BZL1,O15234,P23297,P15241,P23219,P02652,Q96RU3,Q9NXA8,Q96T23,P02654,Q 9Y3D6,Q8TDX6,Q9Y6K5,P02647,Q16795,Q8N5H7,Q9Y244,P33241,P14317,Q63ZY3,Q14908,Q14344,P10412                                                                                                                                                                                                                                                                                                                                                                                                                                                                                                                                                                                                                                                                                                                                                                                                                                                                                                                                                                                                                                                                                                                                                                                                                                                                                                                                                                                                                                                                                                                                                                                                                                                                                                                                                                                                                                                                                                                                                                                                                                                                                     |
| Common proteins in TDvsT and NDvsN | p-value<0.05          | TD and ND                 | O14602,Q9Y5J9,O14734,Q96EY8,Q92506,Q9H0U6,Q9Y606,O60220,Q96EL3,Q86WA6,Q9UI30,P62910,P18077                                                                                                                                                                                                                                                                                                                                                                                                                                                                                                                                                                                                                                                                                                                                                                                                                                                                                                                                                                                                                                                                                                                                                                                                                                                                                                                                                                                                                                                                                                                                                                                                                                                                                                                                                                                                                                                                                                                                                                                                                                                                                                                                                                                 |







|          |                              |                                                                                                                                                                                                                                                                                                                                                                                                                                                                                                                                                                                                                                                                                                                                                                                                                                                                                    |           |
|----------|------------------------------|------------------------------------------------------------------------------------------------------------------------------------------------------------------------------------------------------------------------------------------------------------------------------------------------------------------------------------------------------------------------------------------------------------------------------------------------------------------------------------------------------------------------------------------------------------------------------------------------------------------------------------------------------------------------------------------------------------------------------------------------------------------------------------------------------------------------------------------------------------------------------------|-----------|
|          |                              | DUFB3,NDUFB4,NDUFB5,NDUFB6,NDUFB7,NDUFB8,Q9Y6M9,NDUFB10,NDUFC1,NDUFC2,P28331,O75306,NDUFS3,P49821,O43181,NDUFS5,O75380,NDUFS8,NDUFV2,NDUFV3,NFKB1,Q9P0J0,P99999,Q9NX14,PPARA,NDUFA12,RELA,SDHA,SDHB,SDHC,SDHD,UQCRB,UQCRC1,P22695,UQCRFS1,P07919,P42574,P55210,COX7A2L,P20674,MT-CYB                                                                                                                                                                                                                                                                                                                                                                                                                                                                                                                                                                                               |           |
| hsa05166 | HTLV-I infection             | CDKN1A,ANAPC10,POLD3,ADCY2,ADCY3,ADCY5,ADCY6,ADCY7,ADCY8,CHUK,ADCY9,CREBBP,P35222,DVL1,DVL2,DVL3,ADCY4,EP300,CDC26,P05141,P12236,ANAPC2,ANAPC4,IKKBK,MAD2L1,MAP3K1,NFKB1,NFKBIA,NFYB,P12004,ANAPC5,ANAPC7,ANAPC11,POLE3,P28340,P49005,POLE,POLE2,P17612,POLE4,POLD4,RB1,CCND1,RELA,BCL2L1,ANAPC1,BUB1B,TP53,P21796,P45880,Q9Y277,XPO1,CDC23,CDC16,BUB3,PTTG1,CDC20,CDC27                                                                                                                                                                                                                                                                                                                                                                                                                                                                                                           | 1.939E-3  |
| hsa05169 | Epstein-Barr virus infection | P24941,Q00487,CDKN1A,CDKN1B,TAB1,POLR3A,CHUK,CREBBP,EP300,TAB2,POLR2J2,Q00403,GTF2E1,HSPA6,HSPA8,P04792,IKKBK,ENTPD8,NFKB1,NFKBIA,POLR1D,POLR2A,POLR2B,P19387,POLR2D,P19388,POLR2F,POLR2G,P52434,P36954,POLR2J,POLR2K,POLR2L,POLR2J3,P17612,POLR3B,P62191,P35998,P17980,P43686,PSMC5,P62333,Q99460,Q13200,O43242,P55036,P51665,P48556,O00231,PSMD12,Q9UNM6,RB1,BCL2,RELA,SKP2,MAP3K7,TP53,TRAF6,XPO1,YWHAH,NUP214,ENTPD1,O15160,ENTPD3,P06493,Q15008                                                                                                                                                                                                                                                                                                                                                                                                                               | 9.47E-11  |
| hsa05215 | Prostate cancer              | P24941,CDKN1A,CDKN1B,CHUK,CREBBP,P35222,EGFR,EP300,MTOR,P07900,P08238,IKKBK,NFKB1,NFKBIA,PDPK1,MAPK1,RB1,CCND1,BCL2,RELA,TP53,HSP90B1,CASP9                                                                                                                                                                                                                                                                                                                                                                                                                                                                                                                                                                                                                                                                                                                                        | 2.624E-2  |
| hsa03013 | RNA transport                | SNUPN,Q86V81,SRRM1,RPP38,NUP50,RNPS1,NUPL2,DDX20,Q8NFH5,EEF1A1,P47813,P05198,P41091,P60842,EIF4A2,P23588,P06730,Q04637,EIF5,O15234,P52298,NUP205,NUP210,NUP160,NUP188,NUP62,Q8TEQ6,UPF2,P11940,NUP43,P60228,P61326,NCBP1,NUP88,GEMIN4,NMD3,P-HAX,NUP54,NUP133,NUP107,RANBP2,P46060,UPF1,SEC13,UPF3B,UPF3A,P55854,P12270,XPO1,Q8NFH4,GEMIN7,GEMIN6,NUP85,NUP214,AAAS,P78406,GEMIN2,EIF3A,P55884,Q99613,O15371,O00303,O75821,O15372,Q13347,O75822,P20042,O14602,NUP155,EIF5B,TGS1,NUP93,P38919,NUP153                                                                                                                                                                                                                                                                                                                                                                                | 2.682E-19 |
| hsa05010 | Alzheimer's disease          | NDUFA11,P13073,COX5B,COX6A1,P14854,COX6C,P14406,P15954,COX8A,CYC1,UQCRQ,UQCR10,APAF1,NDUFS7,MT-CO1,P00403,MT-CO3,NDUFA1,NDUFA2,NDUFA4,NDUFA5,P51970,Q16795,NDUFA10,O14561,NDUFB1,NDUFB2,NDUFB3,NDUFB4,NDUFB5,NDUFB6,NDUFB7,NDUFB8,Q9Y6M9,NDUFB10,NDUFC1,NDUFC2,P28331,O75306,NDUFS3,P49821,O43181,NDUFS5,O75380,NDUFS8,NDUFV2,NDUFV3,Q9P0J0,P99999,Q9NX14,MAPK1,NDUFA12,SDHA,SDHB,SDHC,SDHD,UQCRB,UQCRC1,P22695,UQCRFS1,P07919,P42574,P55210,CASP9,COX7A2L,P20674,MT-CYB                                                                                                                                                                                                                                                                                                                                                                                                           | 2.186E-15 |
| hsa00240 | Pyrimidine metabolism        | NME6,POLD3,POLR3A,CANT1,Q5EBM0,UPRT,P17812,DCK,DCTD,TWISTNB,NT5C2,POLA2,POLR2J2,NME7,NT5C,P50583,Q9BY32,ENTPD8,P15531,P22392,NME3,NME4,P00491,P21589,POLR1D,CMPK1,POLE3,POLA1,P28340,P49005,POLE,POLE2,POLR2A,POLR2B,P19387,POLR2D,P19388,POLR2F,POLR2G,P52434,P36954,POLR2J,POLR2K,POLR2L,POLR2J3,PRIM1,POLR3B,CTPS2,POLE4,NT5M,POLD4,TK1,TYMS,P11172,Q9H773,NME5,POLR1B,NT5C1A,Q8TCS8,ENTPD1,O15160,ENTPD6,ENTPD3,O75356,ENTPD4,NT5C1B-RDH14,NME1-NME2                                                                                                                                                                                                                                                                                                                                                                                                                           | 1.308E-30 |
| hsa03015 | mRNA surveillance pathway    | Q86V81,SRRM1,PAPOLA,RNPS1,CLP1,O43809,Q05048,P33240,CSTF3,P62495,O15234,P52298,SMG1,SMG6,SMG5,UPF2,P11940,P61326,NCBP1,PCF11,CPSF3,CPSF2,P36873,PPP2CA,P30153,PPP2R2A,UPF1,UPF3B,UPF3A,Q8N684,Q6UXN9,Q86U42,P38919,SMG7                                                                                                                                                                                                                                                                                                                                                                                                                                                                                                                                                                                                                                                            | 4.426E-7  |
| hsa03010 | Ribosome                     | P62854,Q13084,P09001,P42766,MRPL10,RPS4Y2,RPL10L,Q6P5R6,FAU,P40429,Q9Y3U8,Q9BYD1,Q9H0U6,Q9P015,Q9NWU5,RPSA,P62906,Q9Y3D3,MRPS18C,Q71UM5,Q5T653,Q9BYD3,MRPS7,Q9Y399,RPL26L1,RSL24D1,Q9P0M9,Q9NX20,Q9BYC9,Q9NVS2,P82664,P39023,RPL3L,P36578,P46777,Q02878,P18124,P62424,P62917,P32969,P27635,P62913,RPL12,P63373,P61313,P18621,Q07020,Q02543,P84098,RPL21,P35268,P62750,Q16540,P83731,RPL26,P61353,P62888,P46776,P46779,P47914,P62899,P62910,P49207,P18077,RPL36AL,P61927,P61513,P63173,RPL39,RPL41,P83881,P05388,P05386,P05387,P52815,MRPS12,P15880,P23396,RPS3A,RPS4X,P22090,P46782,P62753,P62081,P62241,P46783,P62280,P25398,P62277,P62263,P62841,P62244,P62249,RPS17,P39019,P60866,P63220,P62266,P62847,P62851,RPS27,RPS27A,P62857,RPS29,Q9NRX2,O60783,MRPL14,MRPS15,MRPS11,P82933,P82932,MRPS5,MRPL36,MRPL34,Q9BYC8,Q9Y37,MRPL9,MRPL1,P62987,MRPL24,P50914,P62829,O75394,P49406 | 7.469E-95 |
| hsa00190 | Oxidative phosphorylation    | NDUFA11,P13073,COX5B,COX6A1,P14854,COX6C,P14406,P15954,COX8A,CYC1,UQCRQ,UQCR10,NDUFS7,P00403,NDUFA1,NDUFA2,NDUFA4,NDUFA5,P51970,Q16795,NDUFA10,O14561,NDUFB1,NDUFB2,NDUFB3,NDUFB4,NDUFB5,NDUFB6,NDUFB7,NDUFB8,Q9Y6M9,NDUFB10,NDUFC1,NDUFC2,P28331,O75306,NDUFS3,P49821,O43181,NDUFS5,O75380,NDUFS8,NDUFV2,NDUFV3,Q9P0J0,Q9NX14,NDUFA12,SDHA,SDHB,SDHC,SDHD,UQCRB,UQCRC1,P22695,UQCRFS1,P07919,COX7A2L,P20674,MT-CO3,MT-CYB,MT-ND1,MT-ND2,MT-ND3,MT-ND4,MT-ND4L,MT-ND5,MT-ND6,MT-CO1                                                                                                                                                                                                                                                                                                                                                                                                | 6.797E-23 |
| hsa05012 | Parkinson's disease          | P30405,ADCY5,NDUFA11,P13073,COX5B,COX6A1,P14854,COX6C,P14406,P15954,COX8A,CYC1,UQCRQ,P05141,P12236,UQCR10,APAF1,NDUFS7,NDUFA1,NDUFA2,NDUFA4,NDUFA5,P51970,Q16795,NDUFA10,O14561,NDUFB1,NDUFB2,NDUFB3,NDUFB4,NDUFB5,NDUFB6,NDUFB7,NDUFB8,Q9Y6M9,NDUFB10,NDUFC1,NDUFC2,P28331,O75306,NDUFS3,P49821,O43181,NDUFS5,O75380,NDUFS8,NDUFV2,NDUFV3,PARK2,Q9P0J0,P99999,Q9NX14,P17612,NDUFA12,SDHA,SDHB,SDHC,SDHD,UBB,UQCRB,UQCRC1,P22695,UQCRFS1,P07919,P21796,P45880,Q9Y277,P42574,CASP9,COX7A2L,P20674,MT-CO1,P00403,MT-CO3,MT-CYB,MT-ND1,MT-ND2,MT-ND3,MT-ND4,MT-ND4L,MT-ND5,MT-ND6                                                                                                                                                                                                                                                                                                     | 3.311E-32 |
| hsa05016 | Huntington's disease         | P30405,PPARGC1A,NDUFA11,P13073,COX5B,COX6A1,P14854,COX6C,P14406,P15954,COX8A,CREBBP,CYC1,EP300,POLR2J2,UQCRQ,P05141,P12236,UQCR10,APAF1,NDUFS7,P00403,NDUFA1,NDUFA2,NDUFA4,NDUFA5,P51970,Q16795,NDUFA10,O14561,NDUFB1,NDUFB2,NDUFB3,NDUFB4,NDUFB5,NDUFB6,NDUFB7,NDUFB8,Q9Y6M9,NDUFB10,NDUFC1,NDUFC2,P28331,O75306,NDUFS3,P49821,O43181,NDUFS5,O75380,NDUFS8,NDUFV2,NDUFV3,NRF1,Q9P0J0,P99999,POLR2A,POLR2B,P19387,POLR2D,P19388,POLR2F,POLR2G,P52434,P36954,POLR2J,POLR2K,POLR2L,Q9NX14,POLR2J3,NDUFA12,SDHA,SDHB,SDHC,SDHD,TAF4,TP53,UQCRB,UQCRC1,P22695,UQCRFS1,P07919,P21796,P45880,Q9Y277,P42574,CASP9,COX7A2L,P20674,MT-CYB,MT-CO3,MT-CO1                                                                                                                                                                                                                                     | 2.586E-27 |
| hsa03040 | Spliceosome                  | Q86V81,Q01081,Q15459,PRPF8,TXNL4A,Q12874,Q13435,P26368,HNRNPA3,P52298,O75643,Q15393,SF3B1,PRPF6,P38159,P09651,P07910,P61978,HNRNPU,HSPA6,HSPA8,P61326,HNRNPM,N                                                                                                                                                                                                                                                                                                                                                                                                                                                                                                                                                                                                                                                                                                                     | 1.320E-12 |

|          |                                     |                                                                                                                                                                                                                                                                                  |           |
|----------|-------------------------------------|----------------------------------------------------------------------------------------------------------------------------------------------------------------------------------------------------------------------------------------------------------------------------------|-----------|
|          |                                     | CBP1,Q15365,CDC40,Q07955,SRSF2,P84103,Q08170,Q13243,Q13247,Q16629,P08621,P09012,P09661,SNRPB,P08579,SNRPD1,P62316,P62318,SNRPE,P62306,SNRPG,Q15428,Q9BWJ5,Q7RTV0,Q13242,O43172,Q15029,Q96DI7,DDX23,P38919,DHX38                                                                  |           |
| hsa04120 | Ubiquitin mediated proteolysis      | Q9UNE7,ANAPC10,UBE2C,CDC26,ANAPC2,ANAPC4,MAP3K1,PARK2,FZR1,ANAPC5,ANAPC7,ANAPC11,SMURF1,RFWD2,ANAPC1,P63208,SKP2,TRAF6,UBE2A,UBE2B,UBE2D1,UBE2D2,UBE2E1,P61088,CUL3,Q13616,CDC23,CDC16,BTRC,KEAP1,CDC20,CDC27,P62877                                                             | 1.322E-2  |
| hsa03020 | RNA polymerase                      | POLR3A,TWISTNB,POLR2J2,POLR1D,POLR2A,POLR2B,P19387,POLR2D,P19388,POLR2F,POLR2G,P52434,P36954,POLR2J,POLR2K,POLR2L,POLR2J3,POLR3B,POLR1B,O15160                                                                                                                                   | 3.218E-9  |
| hsa04110 | Cell cycle                          | P24941,CDKN1A,CDKN1B,STAG1,ANAPC10,STAG2,CREBBP,EP300,CDC26,ANAPC2,ANAPC4,MAD2L1,ORC1,P12004,FZR1,ANAPC5,ANAPC7,ANAPC11,PLK1,RAD21,RB1,CCND1,ANAPC1,P63208,SKP2,BUB1,BUB1B,TP53,YWHAE,MAD1L1,Q13616,CDC23,CDC16,CCNH,SMC3,BUB3,PTTG1,ESPL1,P06493,CDC6,CDC20,CDC25A,CDC27,P62877 | 2.964E-8  |
| hsa04114 | Oocyte meiosis                      | P24941,ANAPC10,ADCY2,ADCY3,ADCY5,ADCY6,ADCY7,ADCY8,ADCY9,SGOL1,ADCY4,CDC26,ANAPC2,ANAPC4,MAD2L1,ANAPC5,ANAPC7,ANAPC11,PLK1,P36873,PPP2CA,P30153,P17612,MAPK1,ANAPC1,P63208,AURKA,BUB1,YWHAE,Q13616,CDC23,CDC16,BTRC,SMC3,PTTG1,ESPL1,P06493,CDC20,CDC27,P62877                   | 1.258E-7  |
| hsa03008 | Ribosome biogenesis in eukaryotes   | RCL1,O00567,RPP38,WDR36,O60832,P22087,GTPBP4,GNL3,P56537,NMD3,NOP58,Q9NY12,GNL3L,RBM28,Q9NV31,Q9NX24,UTP6,PWP2,XPO1,EFTUD1,WDR75,UTP15,CIRH1A,Q96G21                                                                                                                             | 2.255E-3  |
| hsa03050 | Proteasome                          | P61289,O00487,PSMB11,PSMA8,PSME4,PSMA1,P25788,P25789,P28066,P60900,O14818,PSMB1,P49721,P49720,PSMB4,PSMB5,PSMB6,PSMB7,P40306,P62191,P35998,P17980,P43686,PSMC5,P62333,Q99460,Q13200,O43242,P55036,P51665,P48556,O00231,PSMD12,Q9UNM6,Q06323,Q9UL46,Q92530,Q15008                 | 4.002E-25 |
| hsa03022 | Basal transcription factors         | ERCC2,ERCC3,P52655,Q00403,GTF2E1,P35269,P13984,GTF2H1,GTF2H3,MNAT1,TAF1,TAF4,TAF6,CCNH                                                                                                                                                                                           | 3.607E-2  |
| hsa03420 | Nucleotide excision repair          | POLD3,ERCC2,ERCC3,GTF2H1,GTF2H3,MNAT1,P12004,POLE3,P28340,P49005,POLE,POLE2,POLE4,POLD4,P27694,RPA2,RPA3,CCNH,P62877                                                                                                                                                             | 8.414E-5  |
| hsa00010 | Glycolysis / Gluconeogenesis        | GALM,LDHAL6A,ALDOA,GCK,HK1,HK2,P52790,LDHB,LDHC,P49419,P11177,PGM1,P14618,Q96G03,ACSS2,HKDC1,Q9NUB1,LDHAL6B                                                                                                                                                                      | 4.494E-2  |
| hsa04260 | Cardiac muscle contraction          | P13073,COX5B,COX6A1,P14854,COX6C,P14406,P15954,COX8A,CYC1,UQCRCQ,UQCRC10,MT-CO1,P00403,MT-CO3,MT-CYB,UQCRCB,UQCRC1,P22695,UQCRCF1,P07919,COX7A2L,P20674                                                                                                                          | 1.017E-2  |
| hsa03030 | DNA replication                     | POLD3,POLA2,P12004,POLE3,POLA1,P28340,P49005,POLE,POLE2,PRIM1,POLE4,POLD4,P27694,RPA2,RPA3                                                                                                                                                                                       | 6.906E-4  |
| hsa03060 | Protein export                      | SEC61B,SEC11A,SEC61G,SPCS1,SEC61A1,SEC61A2,SRPRB,SPCS3,P49458,P37108,SRP19,P61011,SRP68,SRP72,P08240,SEC11C,SPCS2                                                                                                                                                                | 3.139E-9  |
| hsa00052 | Galactose metabolism                | GALM,P15121,Q14376,GCK,B4GALT1,P16278,HK1,HK2,P52790,LALBA,PGM1,Q96G03,O60218,HKDC1,B4GALT2                                                                                                                                                                                      | 4.884E-5  |
| hsa00524 | Butirosin and neomycin biosynthesis | GCK,HK1,HK2,P52790,HKDC1                                                                                                                                                                                                                                                         | 7.605E-4  |

**Table S7.** Over-represented KEGG pathways in the network made with differentially up-regulated proteins in normal colonic mucosa from diabetic patients compared to normal colonic mucosa from non-diabetic patients.

| KEGG id  | KEGG pathway name                                        | Annotated proteins in the network                                                  | FDR adjusted p-value |
|----------|----------------------------------------------------------|------------------------------------------------------------------------------------|----------------------|
| hsa04010 | MAPK signaling pathway                                   | EGF,EGFR,AKT1,GRB2,HSPA8,P04792,JUN,MYC,NFKB1,P60763,RELA,TGFB1,TP53,CDC42         | 4.310E-3             |
| hsa04012 | ErbB signaling pathway                                   | EGF,EGFR,ERBB2,AKT1,GRB2,JUN,MYC,SRC,CBL                                           | 6.139E-4             |
| hsa04014 | Ras signaling pathway                                    | EGF,EGFR,AKT1,GRB2,HGF,IGF1,RHOA,MET,NFKB1,P60763,RELA,CDC42                       | 1.261E-2             |
| hsa04015 | Rap1 signaling pathway                                   | P35222,EGF,EGFR,AKT1,HGF,IGF1,RHOA,MET,PAR6A,PRKCZ,P60763,SRC,CDC42,P12830         | 9.278E-4             |
| hsa04066 | HIF-1 signaling pathway                                  | EGF,EGFR,EP300,ERBB2,AKT1,IGF1,NFKB1,RELA                                          | 7.196E-3             |
| hsa04068 | FoxO signaling pathway                                   | EGF,EGFR,EP300,AKT1,GRB2,IGF1,SMAD2,SMAD3,SMAD4,CCND1,SKP2,TGFB1                   | 1.985E-4             |
| hsa04151 | PI3K-Akt signaling pathway                               | EGF,EGFR,AKT1,GRB2,HGF,P07900,IGF1,ITGA6,MET,MYC,NFKB1,CCND1,RELA,TP53             | 4.440E-2             |
| hsa04210 | Apoptosis                                                | AKT1,NFKB1,NFKBIA,P99999,RELA,TP53                                                 | 3.683E-2             |
| hsa04370 | VEGF signaling pathway                                   | AKT1,P04792,P60763,SRC,CDC42                                                       | 3.615E-2             |
| hsa04510 | Focal adhesion                                           | P35222,EGF,EGFR,ERBB2,AKT1,GRB2,HGF,IGF1,ITGA6,JUN,RHOA,MET,P60763,CCND1,SRC,CDC42 | 5.072E-5             |
| hsa04550 | Signaling pathways regulating pluripotency of stem cells | P35222,AKT1,GRB2,IGF1,SMAD2,SMAD3,SMAD4,MYC,SKIL                                   | 1.355E-2             |

|          |                                                      |                                                                                                                                                                                                                                                     |           |
|----------|------------------------------------------------------|-----------------------------------------------------------------------------------------------------------------------------------------------------------------------------------------------------------------------------------------------------|-----------|
| hsa04660 | T cell receptor signaling pathway                    | AKT1,GRB2,JUN,RHOA,NFKB1,NFKBIA,RELA,CBL,CDC42                                                                                                                                                                                                      | 2.E-3     |
| hsa04662 | B cell receptor signaling pathway                    | AKT1,GRB2,JUN,NFKB1,NFKBIA,P60763,RELA                                                                                                                                                                                                              | 4.606E-3  |
| hsa04668 | TNF signaling pathway                                | JAG1,AKT1,JUN,NFKB1,NFKBIA,RELA,ITCH                                                                                                                                                                                                                | 3.535E-2  |
| hsa04722 | Neurotrophin signaling pathway                       | AKT1,GRB2,JUN,RHOA,NFKB1,NFKBIA,RELA,TP53,CDC42                                                                                                                                                                                                     | 4.774E-3  |
| hsa04915 | Estrogen signaling pathway                           | EGFR,AKT1,GRB2,HSPA8,P07900,JUN,SRC                                                                                                                                                                                                                 | 2.094E-2  |
| hsa04917 | Prolactin signaling pathway                          | AKT1,GRB2,NFKB1,CCND1,RELA,SRC                                                                                                                                                                                                                      | 1.807E-2  |
| hsa04919 | Thyroid hormone signaling pathway                    | P35222,EP300,AKT1,MYC,NOTCH1,CCND1,SRC,TP53                                                                                                                                                                                                         | 1.496E-2  |
| hsa04932 | Non-alcoholic fatty liver disease (NAFLD)            | P13073,COX5B,COX6A1,COX6A2,P14854,COX6C,P15954,COX8A,CYC1,AKT1,UQCRCQ,UQCRCR10,UN,MT-CO1,P00403,MT-CO3,MT-CYB,NDUFA4,P51970,NFKB1,P99999,RELA,TGFB1,UQCRB,UQCRC1,P22695,UQCRFS1,P07919,ITCH,COX7A2L,P20674,CDC42                                    | 2.698E-22 |
| hsa04933 | AGE-RAGE signaling pathway in diabetic complications | AKT1,JUN,SMAD2,SMAD3,SMAD4,NFKB1,PRKCZ,CCND1,RELA,TGFB1,CDC42                                                                                                                                                                                       | 9.078E-5  |
| hsa05142 | Chagas disease (American trypanosomiasis)            | AKT1,JUN,SMAD2,SMAD3,NFKB1,NFKBIA,RELA,TGFB1                                                                                                                                                                                                        | 7.507E-3  |
| hsa05145 | Toxoplasmosis                                        | AKT1,HSPA8,ITGA6,NFKB1,NFKBIA,P99999,RELA,TGFB1                                                                                                                                                                                                     | 1.496E-2  |
| hsa05160 | Hepatitis C                                          | EGF,EGFR,AKT1,GRB2,NFKB1,NFKBIA,RELA,TP53                                                                                                                                                                                                           | 2.894E-2  |
| hsa05161 | Hepatitis B                                          | EP300,AKT1,GRB2,JUN,SMAD3,SMAD4,MYC,NFKB1,NFKBIA,P99999,CCND1,RELA,SRC,TGFB1,TP53                                                                                                                                                                   | 4.572E-6  |
| hsa05166 | HTLV-I infection                                     | P35222,EP300,AKT1,JUN,SMAD2,SMAD3,SMAD4,MYC,NFKB1,NFKBIA,CCND1,RELA,TGFB1,TP53,CDC27                                                                                                                                                                | 1.867E-3  |
| hsa05169 | Epstein-Barr virus infection                         | EP300,AKT1,HSPA8,P04792,JUN,MYC,NEDD4,NFKB1,NFKBIA,RELA,SKP2,TP53                                                                                                                                                                                   | 4.774E-3  |
| hsa05200 | Pathways in cancer                                   | P35222,EGF,EGFR,EP300,ERBB2,AKT1,GRB2,HGF,P07900,IGF1,ITGA6,JUN,RHOA,SMAD2,SMAD3,SMAD4,MET,MYC,NFKB1,NFKBIA,LEF1,P99999,P60763,CCND1,RELA,SKP2,TGFB1,TP53,CBL,CDC42,P12830                                                                          | 1.413E-9  |
| hsa05205 | Proteoglycans in cancer                              | P35222,EGFR,ERBB2,AKT1,GRB2,HGF,IGF1,RHOA,SMAD2,MET,MYC,CCND1,SRC,TGFB1,TP53,CBL,CDC42                                                                                                                                                              | 1.250E-5  |
| hsa05210 | Colorectal cancer                                    | P35222,AKT1,JUN,RHOA,SMAD2,SMAD3,SMAD4,MYC,LEF1,P99999,P60763,CCND1,TGFB1,TP53                                                                                                                                                                      | 5.385E-10 |
| hsa05211 | Renal cell carcinoma                                 | EP300,AKT1,GRB2,HGF,JUN,MET,TGFB1,CDC42                                                                                                                                                                                                             | 5.616E-4  |
| hsa05212 | Pancreatic cancer                                    | EGF,EGFR,ERBB2,AKT1,SMAD2,SMAD3,SMAD4,NFKB1,P60763,CCND1,RELA,TGFB1,TP53,CDC42                                                                                                                                                                      | 1.188E-9  |
| hsa05213 | Endometrial cancer                                   | P35222,EGF,EGFR,ERBB2,AKT1,GRB2,MYC,LEF1,CCND1,TP53,P12830                                                                                                                                                                                          | 1.184E-7  |
| hsa05214 | Glioma                                               | EGF,EGFR,AKT1,GRB2,IGF1,CCND1,TP53                                                                                                                                                                                                                  | 2.418E-3  |
| hsa05215 | Prostate cancer                                      | P35222,EGF,EGFR,EP300,ERBB2,AKT1,GRB2,P07900,IGF1,NFKB1,NFKBIA,LEF1,CCND1,RELA,TP53                                                                                                                                                                 | 5.542E-9  |
| hsa05218 | Melanoma                                             | EGF,EGFR,AKT1,HGF,IGF1,MET,CCND1,TP53,P12830                                                                                                                                                                                                        | 1.656E-4  |
| hsa05220 | Chronic myeloid leukemia                             | AKT1,GRB2,SMAD3,SMAD4,MYC,NFKB1,NFKBIA,CCND1,RELA,TGFB1,TP53,CBL                                                                                                                                                                                    | 4.452E-7  |
| hsa05221 | Acute myeloid leukemia                               | AKT1,GRB2,MYC,NFKB1,LEF1,CCND1,RELA                                                                                                                                                                                                                 | 1.232E-3  |
| hsa05222 | Small cell lung cancer                               | AKT1,ITGA6,MYC,NFKB1,NFKBIA,P99999,CCND1,RELA,SKP2,TP53                                                                                                                                                                                             | 1.232E-4  |
| hsa05223 | Non-small cell lung cancer                           | EGF,EGFR,ERBB2,AKT1,GRB2,CCND1,TP53                                                                                                                                                                                                                 | 1.132E-3  |
| hsa05230 | Central carbon metabolism in cancer                  | EGFR,ERBB2,AKT1,O94925,MET,MYC,TP53,O43819                                                                                                                                                                                                          | 6.052E-4  |
| hsa05203 | Viral carcinogenesis                                 | EP300,GRB2,JUN,RHOA,NFKB1,NFKBIA,CCND1,RELA,SKP2,SRC,TP53,CDC42                                                                                                                                                                                     | 5.981E-3  |
| hsa04144 | Endocytosis                                          | STAM2,SNF8,Q96CW1,AP2S1,P09496,Q8NEZ2,AP2A1,AP2A2,P63010,P50570,EGF,EGFR,P42566,Q9UN37,Q9Y6I3,Q96B97,HSPA8,RHOA,SMAD2,SMAD3,MET,NEDD4,PARD6A,VPS36,VPS37C,PRKCZ,EPS15L1,SH3GL2,SNX1,SRC,TGFB1,TSG101,VPS37B,STAM,ITCH,VPS25,CBL,O14964,O75351,CDC42 | 9.332E-23 |

|          |                                                            |                                                                                                                                                                                                                             |           |
|----------|------------------------------------------------------------|-----------------------------------------------------------------------------------------------------------------------------------------------------------------------------------------------------------------------------|-----------|
| hsa05206 | MicroRNAs in cancer                                        | SPRY2,EGFR,EP300,ERBB2,O94925,GRB2,RHOA,MET,MYC,NFKB1,NOTCH1,CCND1,TP53                                                                                                                                                     | 1.261E-2  |
| hsa04310 | Wnt signaling pathway                                      | P35222,EP300,JUN,RHOA,SMAD3,SMAD4,MYC,LEF1,P60763,CCND1,TP53                                                                                                                                                                | 1.130E-3  |
| hsa05010 | Alzheimer's disease                                        | ADAM10,P13073,COX5B,COX6A1,COX6A2,P14854,COX6C,P15954,COX8A,CYC1,NCSTN,UQCRQ,UQCR10,MT-CO1,P00403,MT-CO3,MT-CYB,MT-ND1,MT-ND4,MT-ND5,NDUFA4,P51970,P99999,UQCRB,UQCRC1,P22695,UQCRFS1,P07919,COX7A2L,P20674                 | 9.090E-16 |
| hsa00190 | Oxidative phosphorylation                                  | P13073,COX5B,COX6A1,COX6A2,P14854,COX6C,P15954,COX8A,COX10,CYC1,UQCRQ,UQCR10,MT-CO1,P00403,MT-CO3,MT-CYB,MT-ND1,MT-ND4,MT-ND5,NDUFA4,P51970,UQCRB,UQCRC1,P22695,UQCRFS1,P07919,COX7A2L,P20674                               | 1.419E-19 |
| hsa05012 | Parkinson's disease                                        | P13073,COX5B,COX6A1,COX6A2,P14854,COX6C,P15954,COX8A,CYC1,UQCRQ,UQCR10,MT-CO1,P00403,MT-CO3,MT-CYB,MT-ND1,MT-ND4,MT-ND5,NDUFA4,P51970,P99999,UBB,UQCRB,UQCRC1,P22695,UQCRFS1,P07919,COX7A2L,P20674                          | 9.7E-20   |
| hsa05016 | Huntington's disease                                       | Q96CW1,AP2S1,P09496,P13073,COX5B,COX6A1,COX6A2,P14854,COX6C,P15954,COX8A,CYC1,AP2A1,AP2A2,P63010,EP300,UQCRQ,UQCR10,NDUFA4,P51970,P99999,TP53,UQCRB,UQCRC1,P22695,UQCRFS1,P07919,COX7A2L,P20674,MT-CYB,MT-CO1,P00403,MT-CO3 | 4.338E-20 |
| hsa04350 | TGF-beta signaling pathway                                 | EP300,RHOA,SMAD2,SMAD3,SMAD4,SMAD7,MYC,TGFB1                                                                                                                                                                                | 2.191E-3  |
| hsa05100 | Bacterial invasion of epithelial cells                     | P09496,P35222,P50570,RHOA,MET,SRC,CBL,CDC42,P12830                                                                                                                                                                          | 3.162E-4  |
| hsa05131 | Shigellosis                                                | NFKB1,NFKBIA,RELA,SRC,CDC42                                                                                                                                                                                                 | 4.806E-2  |
| hsa04520 | Adherens junction                                          | P35222,EGFR,EP300,ERBB2,RHOA,SMAD2,SMAD3,SMAD4,MET,LEF1,P60763,SRC,CDC42,P12830                                                                                                                                             | 4.112E-9  |
| hsa04110 | Cell cycle                                                 | EP300,SMAD2,SMAD3,SMAD4,MYC,CCND1,SKP2,TGFB1,TP53,CDC27                                                                                                                                                                     | 1.713E-3  |
| hsa05219 | Bladder cancer                                             | EGF,EGFR,ERBB2,MYC,CCND1,SRC,TP53,P12830                                                                                                                                                                                    | 2.365E-5  |
| hsa05120 | Epithelial cell signaling in Helicobacter pylori infection | ADAM10,EGFR,JUN,MET,NFKB1,NFKBIA,RELA,SRC,CDC42                                                                                                                                                                             | 1.232E-4  |
| hsa04390 | Hippo signaling pathway                                    | P35222,SMAD2,SMAD3,SMAD4,SMAD7,MYC,PARD6A,LEF1,PRKCZ,CCND1,TGFB1,P12830                                                                                                                                                     | 6.139E-4  |
| hsa04721 | Synaptic vesicle cycle                                     | Q96CW1,AP2S1,P09496,AP2A1,AP2A2,P63010,P50570                                                                                                                                                                               | 2.090E-3  |
| hsa05216 | Thyroid cancer                                             | P35222,MYC,LEF1,CCND1,TP53,P12830                                                                                                                                                                                           | 2.630E-4  |
| hsa00430 | Taurine and hypotaurine metabolism                         | GAD1,GAD2,P36269,BAAT                                                                                                                                                                                                       | 5.474E-4  |
| hsa04260 | Cardiac muscle contraction                                 | P13073,COX5B,COX6A1,COX6A2,P14854,COX6C,P15954,COX8A,CYC1,UQCRQ,UQCR10,MT-CO1,P00403,MT-CO3,MT-CYB,UQCRB,UQCRC1,P22695,UQCRFS1,P07919,COX7A2L,P20674                                                                        | 3.358E-18 |
| hsa04330 | Notch signaling pathway                                    | JAG1,EP300,NCSTN,DLL1,NOTCH1,NUMB                                                                                                                                                                                           | 2.823E-3  |
| hsa05134 | Legionellosis                                              | HSPA8,NFKB1,NFKBIA,P99999,RELA                                                                                                                                                                                              | 2.6263E-2 |
| hsa04961 | Endocrine and other factor-regulated calcium reabsorption  | Q96CW1,AP2S1,P09496,AP2A1,AP2A2,P63010,P50570                                                                                                                                                                               | 4.678E-4  |
| hsa05321 | Inflammatory bowel disease (IBD)                           | JUN,SMAD2,SMAD3,NFKB1,RELA,TGFB1                                                                                                                                                                                            | 1.202E-2  |

**Table S8.** Over-represented KEGG pathways in tumors from diabetic patients (TD) and normal colonic mucosas from diabetic patients (ND) compared to tumors from non-diabetic patients (T) and normal colonic mucosas from non-diabetic patients (N) respectively.

| KEGG id  | KEGG pathway name                         |
|----------|-------------------------------------------|
| hsa04932 | Non-alcoholic fatty liver disease (NAFLD) |
| hsa05166 | HTLV-I infection                          |
| hsa05169 | Epstein-Barr virus infection              |
| hsa05215 | Prostate cancer                           |
| hsa05010 | Alzheimer's disease                       |
| hsa00190 | Oxidative phosphorylation                 |
| hsa05012 | Parkinson's disease                       |
| hsa05016 | Huntington's disease                      |

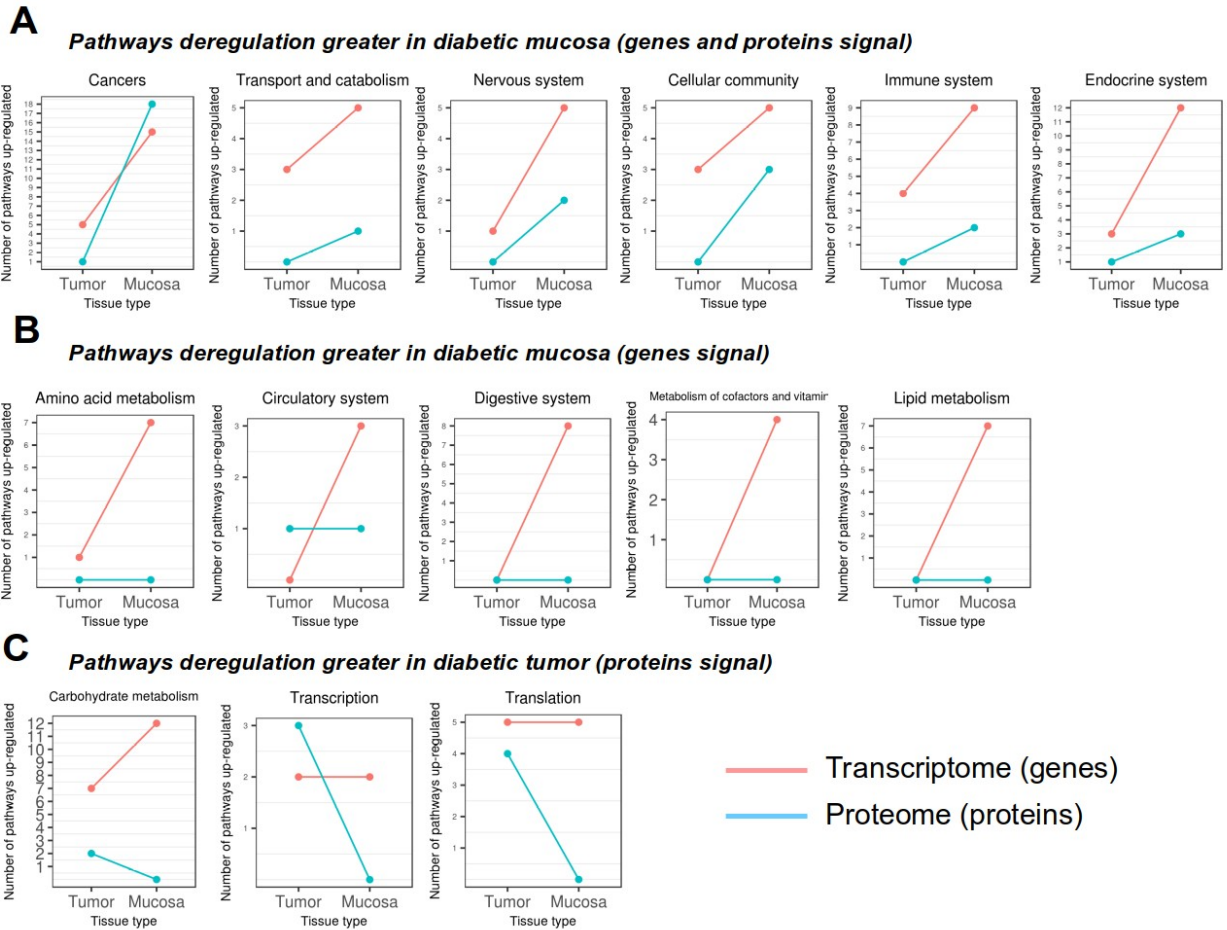

**Figure S4. (A,B,C)** General trends in deregulation of genes and proteins in diabetic tumor and diabetic mucosa. We calculated the number of over-represented pathways (classified by super-classes) in the two initial comparisons (diabetic tumor versus non-diabetic tumor and diabetic normal colonic mucosa versus non-diabetic normal colonic mucosa), then we compare these number from in each tissue (diabetic tumor or diabetic mucosa) to extract general trends in the deregulation of pathways in tumors and mucosa under the effect of diabetes.
